# Supplementary material
Source: publisher figshare collection journal article supplement (https://geolsoc.figshare.com/articles/dataset/_/3454958)
Supplement: Supplementary file 1 [file 1]

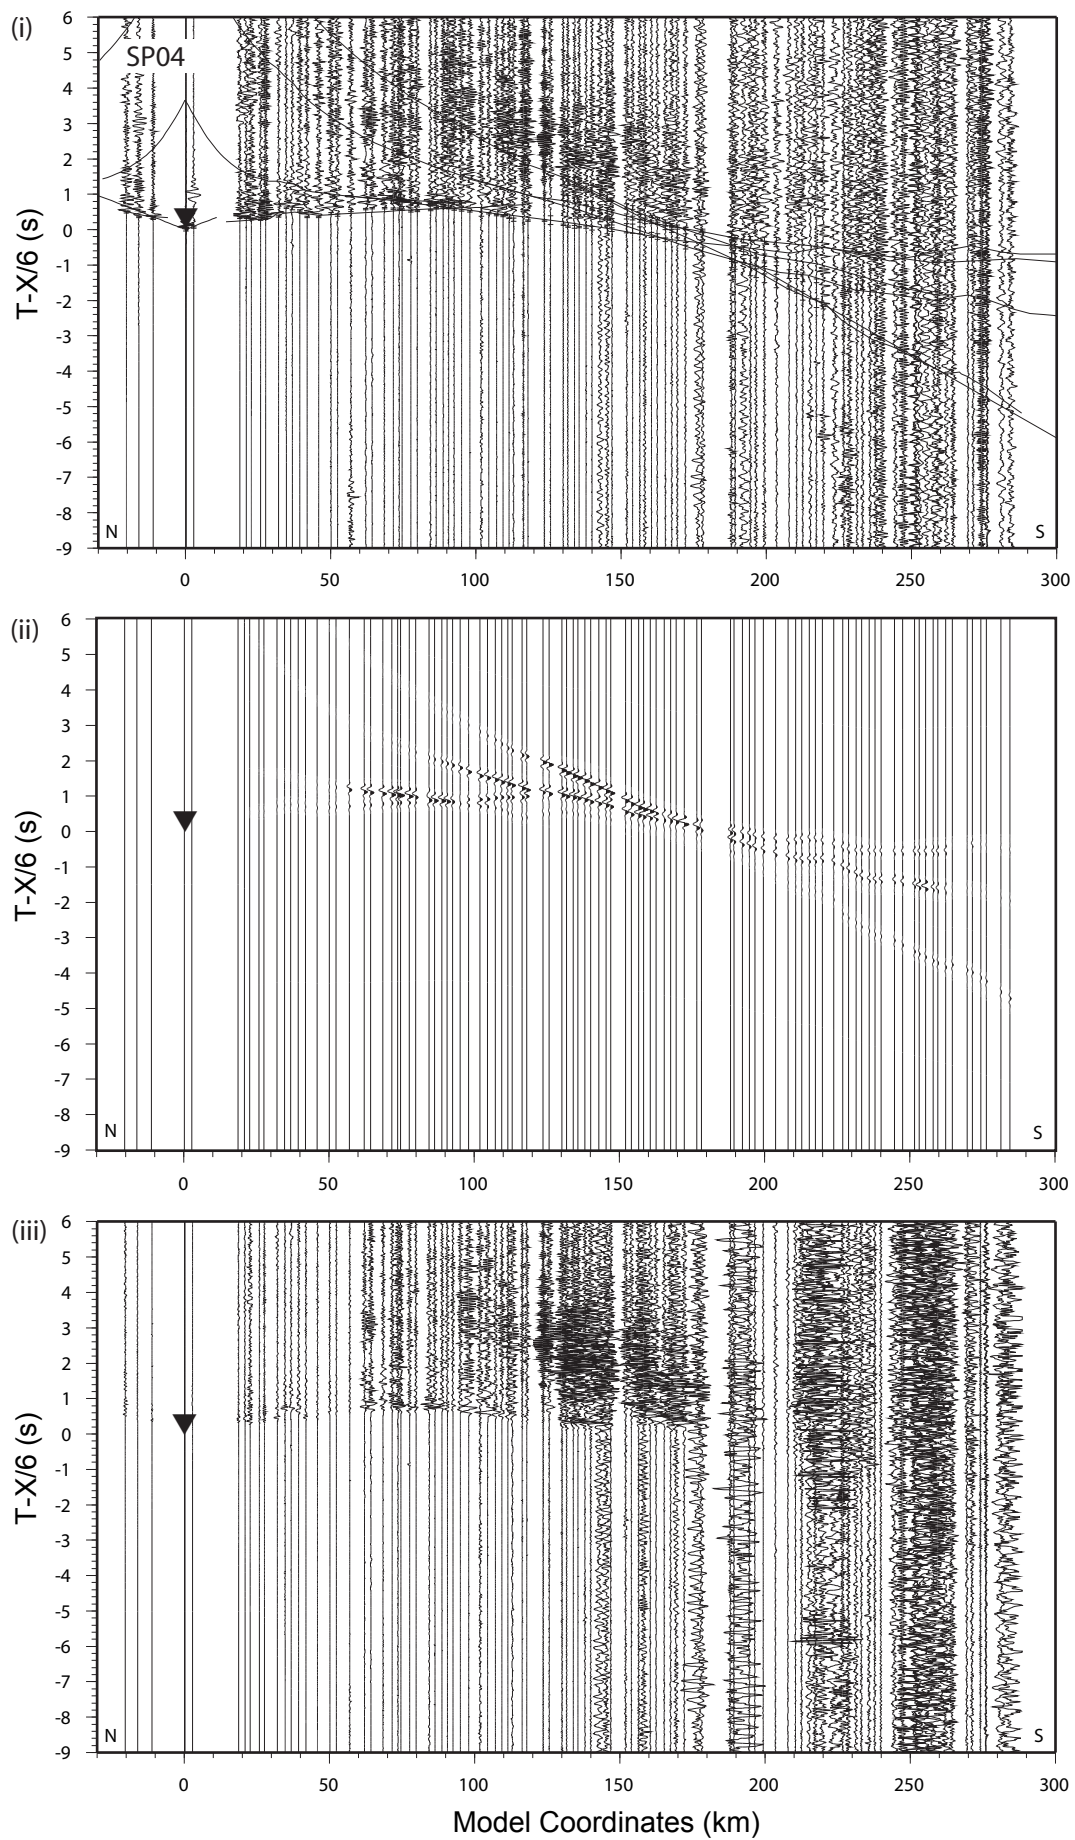

▼ shot point location; Horizontal distance in km from SP04; Reduction velocity 6 km s<sup>-1</sup>  
 (i) Trace normalised section (bandpass filter 2-20 Hz) including picks and modelled travel-time curves for various phases derived from final model; (ii) true amplitude synthetic section derived from final model; (iii) true amplitude seismic section (bandpass filter 2-20 Hz)
